# Supplementary material
Source: publisher site journal article supplement (https://www.dovepress.com/article/253108)
Supplement: Supplementary file 1 [file get_supplementary_file.php]

**Supplementary Material**

**S1.** Primers sequences of cardio-specific genes

| **Gene** | **Forward** | **Reverse** |
| --- | --- | --- |
| **TNNT1** | 5'-GCA TGG AGA AAG ACC TGC TG-3' | 5'-CTG TTG CTC GGC TCT CTC TG-3' |
| **NKX2.5** | 5'-CCC CTG GAT TTT GCA TTC AC-3' | 5'-CGT GCG CAA GAA CAA ACG-3' |
| **DES** | 5'-AGT TGC AGG CTC AGC TTC AG-3' | 5'-TCA TCA TGA GCC CGG ATG TC-3' |
| **GAPDH** | 5'-CTCTGCTCCTCCTGTTCGAC-3' | 5'-GCGCCCAATACGACCAAATC-3' |
